# Supplementary material
Source: publisher figshare collection journal article supplement (https://tandf.figshare.com/articles/dataset/_/16628908)
Supplement: Supplementary file 1 [file 1]

Supplemental Online Material S1. Demographic characteristics and factors, shown per hospital ward

|                                       | Gastrointestinal<br>surgery #1<br>n = 24 | Gastrointestinal<br>surgery #2<br>n = 20 | Haematology<br>n = 22 | Infectious<br>diseases<br>n = 23 | Cardiology<br>n = 25 |
|---------------------------------------|------------------------------------------|------------------------------------------|-----------------------|----------------------------------|----------------------|
| <b>Demographic characteristics</b>    |                                          |                                          |                       |                                  |                      |
| Age (years), median (IQR)             | 59 (46-66)                               | 59 (42-73)                               | 56.5 (33-68)          | 62 (47-71)                       | 70 (54.5-76.5)       |
| Length of Stay (days), median (IQR)   | 7.5 (5.25-16.75)                         | 10 (8-18)                                | 25 (20-38)            | 12 (8-19)                        | 12 (9.25-37.75)      |
| Female n (%)                          | 6 (25%)                                  | 4 (20%)                                  | 10 (45.5%)            | 12 (52.2%)                       | 10 (40%)             |
| Pre-admission living situation, n (%) |                                          |                                          |                       |                                  |                      |
| <i>Alone</i>                          | 6 (25%)                                  | 4 (20%)                                  | 9 (40.9%)             | 11 (47.8%)                       | 12 (48%)             |
| <i>Partner</i>                        | 17 (70.8%)                               | 14 (70%)                                 | 13 (59.1%)            | 12 (52.2%)                       | 11 (44%)             |
| <i>Caregiver</i>                      | 1 (4.2%)                                 | 0                                        | 0                     | 0                                | 0                    |
| <i>Rehab center</i>                   | 0                                        | 1 (5%)                                   | 0                     | 0                                | 0                    |
| <i>Nursing home</i>                   | 0                                        | 1 (5%)                                   | 0                     | 0                                | 0                    |
| <i>Missing</i>                        | 0                                        | 0                                        | 0                     | 0                                | 2 (8%)               |
| Discharge destination, n (%)          |                                          |                                          |                       |                                  |                      |
| <i>Home</i>                           | 23 (95.8%)                               | 17 (85%)                                 | 20 (90.9%)            | 20 (87%)                         | 21 (84%)             |
| <i>Rehab center</i>                   | 0                                        | 1 (5%)                                   | 0                     | 2 (8.7%)                         | 1 (4%)               |
| <i>Nursing home</i>                   | 0                                        | 0                                        | 0                     | 1 (4.3%)                         | 0                    |
| <i>Secondary hospital</i>             | 1 (4.2%)                                 | 1 (5%)                                   | 1 (4.5%)              | 0                                | 2 (8%)               |
| <i>End-of-life care center</i>        | 0                                        | 0                                        | 1 (4.5%)              | 0                                | 0                    |

|                                                                  |               |                  |                |               |                  |
|------------------------------------------------------------------|---------------|------------------|----------------|---------------|------------------|
| <i>Died</i>                                                      | 0             | 1 (5%)           | 0              | 0             | 1 (4%)           |
| Unplanned readmission <3 months, n (%)                           | 6 (25%)       | 7 (35%)          | 8 (36.4%)      | 8 (34.8%)     | 5 (20%)          |
| <b>Factors</b>                                                   |               |                  |                |               |                  |
| Admission-day of observations <sup>1</sup> , median (IQR)        | 4 (2.25-7.50) | 6 (3-12)         | 9.5 (4.5-22.5) | 8 (4-12)      | 10 (4-18)        |
| Acute admission, n (%)                                           | 6 (25%)       | 4 (20%)          | 11 (50%)       | 23 (100%)     | 24 (96%)         |
| Surgery during admission, n (%)                                  | 21 (87.5%)    | 18 (90%)         | 1 (4.5%)       | 3 (13%)       | 5 (20%)          |
| Charlson Comorbidity Index, median (IQR)                         | 2 (0.25-4)    | 3 (1.25-6)       | 3 (2-5)        | 5 (0-8)       | 4 (1.5-5)        |
| Preadmission ADL-impairment <sup>2</sup> , n (%)                 | 3 (13.6%)     | 1 (5%)           | 2 (9.1%)       | 5 (22.7%)     | 5 (21.7%)        |
|                                                                  | (missing n=2) |                  |                | (missing n=1) | (missing n=2)    |
| Muscle strength (kg) <sup>3</sup> , mean (SD)                    | 35.75 (17.27) | 33.01 (10.43)    | 28.98 (14.86)  | 25.17 (11.88) | 31.48 (13.67)    |
|                                                                  |               |                  | (missing n=1)  | (missing n=1) | (missing n=1)    |
| AM-PAC Basic Mobility <sup>4</sup> , median (IQR)                | 23 (22-24)    | 23 (19.25-24)    | 24 (23-24)     | 24 (22-24)    | 24 (22-24)       |
| Independent in basic mobility <sup>5</sup> , n (%)               | 14 (58.3%)    | 11 (55%)         | 16 (72.7%)     | 14 (60.9%)    | 19 (76%)         |
| AM-PAC Daily activity <sup>6</sup> , median (IQR)                | 22 (19-24)    | 21.50 (20-23.75) | 24 (23.25-24)  | 24 (21-24)    | 24 (23-24)       |
|                                                                  |               |                  | (missing n=1)  |               |                  |
| Mobility-related self-efficacy score <sup>7</sup> , median (IQR) | 24 (19.25-28) | 22 (19-28)       | 25 (18-27)     | 21 (16-26)    | 22 (19.25-25.75) |
|                                                                  | (missing n=2) |                  | (missing n=3)  |               | (missing n=1)    |
| IV-lines, n (%)                                                  |               |                  |                |               |                  |
| 0                                                                | 1 (4.2%)      | 1 (5%)           | 2 (9.1%)       | 5 (21.7%)     | 3 (12%)          |
| 1                                                                | 9 (37.5%)     | 6 (30%)          | 17 (77.3%)     | 14 (60.9%)    | 22 (88%)         |
| 2                                                                | 9 (37.5%)     | 8 (40%)          | 1 (4.5%)       | 3 (13%)       | 0                |

|                                       |            |          |            |            |          |
|---------------------------------------|------------|----------|------------|------------|----------|
| 3                                     | 3 (12.5%)  | 4 (20%)  | 2 (9.1%)   | 1 (4.3%)   | 0        |
| 4                                     | 2 (8.3%)   | 1 (5%)   | 0          | 0          | 0        |
| Drains, n (%)                         |            |          |            |            |          |
| 0                                     | 8 (33.3%)  | 5 (25%)  | 21 (95.5%) | 21 (91.3%) | 24 (96%) |
| 1                                     | 7 (29.2%)  | 8 (40%)  | 1 (4.5%)   | 2 (8.7%)   | 1 (4%)   |
| 2                                     | 7 (29.2%)  | 5 (25%)  | 0          | 0          | 0        |
| 3                                     | 2 (8.3%)   | 1 (5%)   | 0          | 0          | 0        |
| 4                                     | 0          | 1 (5%)   | 0          | 0          | 0        |
| Presence of a urine catheter, n (%)   | 10 (41.7%) | 11 (55%) | 3 (13.6%)  | 2 (8.7%)   | 4 (16%)  |
| Hospital isolation precautions, n (%) |            |          |            |            |          |
| <i>None</i>                           | 24 (100%)  | 16 (80%) | 17 (77.3%) | 19 (82.6%) | 23 (92%) |
| <i>Contact</i>                        | 0          | 3 (15%)  | 4 (18.2%)  | 3 (13%)    | 2 (8%)   |
| <i>Contact + airborne</i>             | 0          | 1 (5%)   | 1 (4.5%)   | 1 (4.3%)   | 0        |

IQR = interquartile range; SD = standard deviation; kg = kilograms; <sup>1</sup> = number of days between the day of admission and day of observation; <sup>2</sup> = measured using the Katz-ADL; <sup>3</sup> = hand-held dynamometer; <sup>4</sup> = Activity Measure for Post-Acute Care “6-clicks” Basic mobility score; <sup>5</sup> = using question 1 to 5 AM-PAC Basic Mobility short form; <sup>6</sup> = Activity Measure for Post-Acute Care “6-clicks” Daily Activity short form; <sup>7</sup> = maximal self-efficacy score = 28
