# Supplementary material
Source: publisher figshare collection journal article supplement (https://tandf.figshare.com/articles/dataset/_/16628908)
Supplement: Supplementary file 2 [file 1]

Supplemental Online Material S2. Accelerometer results between 8 AM and 8 PM, shown per hospital ward

|                                                              | Gastrointestinal<br>surgery #1<br>N=21<br>(missing n=3) | Gastrointestinal<br>surgery #2<br>N=18<br>(missing n=2) | Haematology<br>N=21<br>(missing n=1) | Infectious<br>diseases<br>N=19<br>(missing n=4) | Cardiology<br>N=23<br>(missing n=2) |
|--------------------------------------------------------------|---------------------------------------------------------|---------------------------------------------------------|--------------------------------------|-------------------------------------------------|-------------------------------------|
| <b>Total number of minutes physical activity<sup>1</sup></b> | 21 (12-37)                                              | 14.5 (8-28)                                             | 55 (20.5-67)                         | 22 (12-31)                                      | 30 (15-61)                          |
| <b>Light physical activity intensity<sup>2</sup></b>         | 19 (9-31)                                               | 12.5 (6-20.25)                                          | 40 (16-54.5)                         | 21 (11-25)                                      | 26 (13-40)                          |
| <b>Moderate physical activity intensity<sup>3</sup></b>      | 3 (2-8.5)                                               | 2 (1-10.5)                                              | 12 (2.5-16.5)                        | 3 (1-5)                                         | 4 (1-20)                            |
| <b>Vigorous physical activity intensity<sup>4</sup></b>      | 0 (0-0)                                                 | 0 (0-0)                                                 | 0 (0-0)                              | 0 (0-0)                                         | 0 (0-0)                             |
| <b>PAM-score<sup>5</sup></b>                                 | 1.88 (1.34-3.82)                                        | 1.28 (0.86-3.44)                                        | 5.44 (1.97-6.94)                     | 1.94 (1.38-2.88)                                | 3.06 (1.44-6.88)                    |

All data is presented in median (IQR [interquartile range]); <sup>1</sup> = minutes physical activity > 1.4 MET (i.e., the total amount of time patients spent on physical activity with light intensity + moderate intensity + vigorous intensity); <sup>2</sup> = minutes between 1.4 and 3.0 MET; <sup>3</sup> = minutes between 3.0 and 7.0 MET; <sup>4</sup> = minutes > 7.0 MET; <sup>5</sup> = index representing the ratio of the energy spent on physical activity compared to a resting metabolism, averaged over the day
