# Supplementary material
Source: publisher figshare collection journal article supplement (https://tandf.figshare.com/articles/dataset/_/16628908)
Supplement: Supplementary file 3 [file 1]

Supplemental Online Material S3. The percentage of time patients spent at each type of activity and location at each hospital ward individually between 8 AM and 8 PM, presented by the mean (standard deviation) percentage of Behavioral Mapping observations.

|                                      | Gastrointestinal<br>surgery #1 <sup>a</sup><br>N=24<br>Median (IQR)<br>observations 68<br>(58-72) | Gastrointestinal<br>surgery #2 <sup>a</sup><br>N=19 <sup>b</sup><br>Median (IQR)<br>observations 69<br>(61-70) | Haematology <sup>a</sup><br>N=22<br>Median (IQR)<br>observations 64<br>(58-67) | Infectious diseases<br>N=23<br>Median (IQR)<br>observations<br>63 (55-67) | Cardiology <sup>a</sup><br>N=25<br>Median (IQR)<br>observations<br>63 (59-66) |
|--------------------------------------|---------------------------------------------------------------------------------------------------|----------------------------------------------------------------------------------------------------------------|--------------------------------------------------------------------------------|---------------------------------------------------------------------------|-------------------------------------------------------------------------------|
| <b>Type of activity</b>              |                                                                                                   |                                                                                                                |                                                                                |                                                                           |                                                                               |
| Lying in bed                         | 67.5% (20.8)                                                                                      | 79.6% (19.1)                                                                                                   | 69.8% (22.9)                                                                   | 75.4% (11.6)                                                              | 51.5% (28.5)                                                                  |
| Sitting                              | 25.7% (17.7)                                                                                      | 15.1% (14.1)                                                                                                   | 22.7% (20.1)                                                                   | 18.7% (10.5)                                                              | 37.6% (25.1)                                                                  |
| Standing / transfer                  | 3.9% (3.6)                                                                                        | 2.2% (2.5)                                                                                                     | 1.5% (1.7)                                                                     | 1.6% (1.6)                                                                | 3.2% (2.4)                                                                    |
| Walking / ergometer                  | 2.8% (2.8)                                                                                        | 3.1% (5.3)                                                                                                     | 6.0% (6.2)                                                                     | 4.3% (4.2)                                                                | 7.7% (7.2)                                                                    |
| <b>Location at the hospital ward</b> |                                                                                                   |                                                                                                                |                                                                                |                                                                           |                                                                               |
| Patient room                         | 93.9% (11.2)                                                                                      | 95.3% (5.3)                                                                                                    | 92.1% (12.8)                                                                   | 96.6% (3.8)                                                               | 85.7% (13.6)                                                                  |
| Toilet / bathroom                    | 2.2% (2.2)                                                                                        | 1.6% (1.8)                                                                                                     | 0.7% (0.9)                                                                     | 0.9% (1.5)                                                                | 2.7% (2.4)                                                                    |
| Hallway                              | 1.0% (1.2)                                                                                        | 1.3% (2.0)                                                                                                     | 3.9% (6.4)                                                                     | 2.1% (2.8)                                                                | 4.4% (4.9)                                                                    |
| Lounge                               | 2.6% (9.3)                                                                                        | 0.8% (3.5)                                                                                                     | 3.2% (7.5)                                                                     | 0.4% (1.5)                                                                | 5.8% (9.2)                                                                    |
| Other                                | 0.3% (1.2)                                                                                        | 0.5% (1.5)                                                                                                     | 0% (0)                                                                         | 0% (0)                                                                    | 1.3% (2.7)                                                                    |

IQR = interquartile range; <sup>a</sup> = percentages don't add to 100% due to rounding error; <sup>b</sup> = observations are missing of n=1 patient
